# Supplementary material
Source: Springer Nature journal article supplement (https://www.springermedizin.de/resource/supplementary/12901_2012_84_MOESM3_ESM.pdf/9515208)
Supplement: MOESM3 [file 9515208]

Inclusion:  
52 healthy persons

Inclusion:  
202 persons with vertigo, dizziness or imbalance

Baseline set of questionnaires adapted for healthy persons:  
VSS-G/ DHI-G/ HADS-G

Baseline set of questionnaires:  
VSS<sub>1</sub>-G/ DHI-G/ HADS-G/ Frequency/  
Intensity/ Disability/ socio-demographic data

Discriminant Validity:  
Pairwise U-Test between diagnostic groups and healthy participants  
ROC-curve for VER

Internal validity:  
PCA with Varimax Rotation (2 factors)  
Internal Consistency:  
Cronbach's  $\alpha$  /  $\alpha$  if item deleted  
CITC  
Construct Validity:  
Spearman's Correlation coefficient  
Kendall's Tau correlation coefficient

After 1 week, a sample of persons assumed to be in stable health condition with respect of dizziness (n=58) received a second questionnaire (VSS<sub>2</sub>-G)

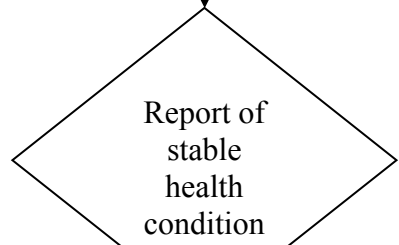

Test-Retest Reliability  
ICC<sub>2,1</sub>

yes  
n= 40

no  
n= 18  
Exclusion of reliability analysis
